# Supplementary material for: A TiN@C core–shell support for improving Pt catalyst corrosion resistance
Source: Royal Society of Chemistry journal article supplement (doi:10.1039/d2ra02569h), 2022-01-01
Supplement: d2ra02569h1.pdf [file d2ra02569h1.pdf]

## A TiN@C core-shell support for improving Pt catalyst corrosion resistance

Hongyu Zhang <sup>a,b</sup>, Jia Liu <sup>b</sup>, Xiao Duan <sup>b</sup>, Mengchen Yuan <sup>b</sup>, Feng Cao <sup>b</sup>, Kui Sun <sup>c</sup>, Yunbo Zhang <sup>c</sup>, Xiaolin Li <sup>c</sup>, Ying Wang <sup>\*c</sup>, Zhengbin Gu <sup>\*b</sup>, Jia Li <sup>\*a</sup>

a. Institute of Energy Power Innovation North China Electric Power University Beijing, Changping 102206, China.

E-mail: [lijia0226@nju.edu.cn](mailto:lijia0226@nju.edu.cn)

b. College of Engineering and Applied Sciences, Nanjing University  
22 Hankou Road, Nanjing 210093 China.

c. China Automotive Innovation Corporation  
88 Shengli Road, Nanjing 211106 China.

### 1. Experimental and measurement

#### 1.1 Synthesis of the TiN@C support.

Firstly, TiO<sub>2</sub> nanoparticles (Macklin, anatase, 5-10 nm, 99.8%) and the GuHCl (Aladdin, 99.5%) with a mass ratio of 1:10 were weighed and mixed well. Then the above samples were spread in the alumina ark and placed in a tubular furnace. Vacuum environment is settled up after vacuum pump working 3-5 minutes. The temperature was heated to 900 °C for 2 h at a heating rate of 10 °C/min, and then naturally cooled to room temperature, the TiN@C support was obtained after grinding finally. The catalyst support synthesized at 900°C with a mass ratio of 1:5, 1:10 and 1:15 were written as TiN@C-1:5, TiN@C-1:10 and TiN@C-1:15, respectively. The sample synthesized by 1:10 at 900 °C is the most representative.

#### 1.2 Synthesis of the Pt/TiN@C catalyst.

Pt/TiN@C catalyst was prepared by a typical Microwave-EG method as reported in our recent work<sup>1</sup>. Firstly, 27 mg TiN@C support powder was placed in a three necked flask containing 50 ml EG. The TiN@C support powder was dispersed evenly in ice water bath by ultrasonic wave for 2 h. Then 400 μL 38.6 mol/mL EG solution of [H<sub>2</sub>PtCl<sub>6</sub>·6H<sub>2</sub>O] was slowly added into the mixed solution, then the PH value was adjusted to 9-10 slowly by 0.5 mol/L EG of NaOH. The mixed solution above was placed in a microwave machine, the microwave power was set to 500W, and the temperature was kept at 180 °C for 10 min at rotating speed 500 rpm with condensing reflux. After natural cooling to room temperature, suction filtration was carried out, and repeatedly washing with 80 °C ultrapure water and ethanol to remove Cl<sup>-</sup> and residual glycol solution. The filtrated product was dried in vacuum at 60 °C overnight, and Pt/TiN@C catalyst was synthesized finally. Unless otherwise noted, Pt load is 9.05 wt% in all catalysts in this paper.

#### 1.3 Physical characterization of the support and catalysts.

XRD (X-ray powder diffraction) patterns were characterized on a Bruker D8 ADVANCE through a Cu Kα radiation source in a 2θ range of 5°–85° at a scanning rate of 5° min<sup>-1</sup>. A Thermo Fisher Scientific XI is used to test

XPS. A FEI Talos-S was used to record TEM images. The system was equipped within EDX detector.

## 1.4 Electrochemical measurement of the support and catalysts.

All the electrochemical measurements involved in this paper were tested on an shanghai Chenhua CHI760E electrochemical work-station at 25°C, which uses a three-electrode consist of counter electrode-Carbon rod, reference electrode-Ag/AgCl (saturated KCl, reference electrode vs. reversible hydrogen electrode (RHE),  $E_{Ag/AgCl} = E_{RHE} + 0.26$  V, and a rotating disk electrode (RDE) system (Pine Research Instrumentation) with working electrode (glassy carbon area is 0.19625 cm<sup>2</sup>).

All the catalyst ink involved in this paper was prepared as follows. 6mg catalyst ink was put into a mixture solution made up of 2682  $\mu$ L absolute ethyl alcohol ethanol, 300  $\mu$ L ultrapure water and 18  $\mu$ L 5% Nafion solution. The catalyst ink obtained above was ultrasonicated to fully disperse with ice water bath for 30 minutes. After that, a pipette gun was used to drop 10  $\mu$ L catalyst ink onto the glassy carbon electrode surface at 350 rpm. Finally, the glassy carbon electrode was dried under an infrared lamp for 5 min.

The Pt loading of all the catalysts involved in this paper refers to the proportion of Pt element mass to the whole catalyst. Pt/C mentioned in this paper refers to 20% JM Pt/C catalyst whose support is Vulcan XC - 72. And current-time test result is normalized to 20% Pt load.

All the RDE chemical tests were measured at 25 °C in N<sub>2</sub>-saturated or O<sub>2</sub>-saturated 0.1 M HClO<sub>4</sub> solution. cyclic voltammetry (CV) tests of the electrocatalysts were characterized at a positive scan rate of 100 mV s<sup>-1</sup> in O<sub>2</sub>-saturated solution and 50 mV s<sup>-1</sup> N<sub>2</sub>-saturated solution at the range of 0 - 1.2 V (vs. RHE). The polarization curves of RDE were recorded at a rate of 1600 rpm and a positive scan rate of 10 mV s<sup>-1</sup> in O<sub>2</sub>-saturated solution. Current-method was carried out in O<sub>2</sub>-saturated 0.1 M HClO<sub>4</sub> solution at 1.2V (vs. RHE) with the rotation of 500 rpm at the room temperature.

## 2. DFT calculation

Slab models are used as basic model in this study<sup>2</sup>, an orthorhombic supercell of 8.51  $\times$  8.51  $\times$  22.0 Å, and a hexagonal supercell of 7.39  $\times$  7.39  $\times$  30 Å with periodic boundary conditions were used for the TiN-supported, graphite-supported single Pt atom. According to the results of the interaction between Pt and N obtained by XPS, A Pt single atom was directly placed above the N site of TiN (1 0 0), and Pt/C is represented by placing a Pt Single atom on graphite. The vacuum spaces for the systems were larger than 12.5 Å. The TiN system consisted of 32 Ti and 32 N atoms and the graphite consisted of 72 carbon atoms<sup>3</sup>. We illustrate the strength of the interaction between Pt nanoparticles and support by calculating the energy of Pt/TiN (Pt single atom on TiN bulk) and Pt/C (Pt single atom on graphite), which indirectly represents the stability of two catalysts.

All calculations were performed using the Vienna ab initio simulation package (VASP) code. The electron-ion interactions were described by projector augmented wave potentials. The exchange-correlation function was described by the generalized gradient approximation (GGA) of Perdew-Burke-Ernzerhof (PBE). The electron wave function was expanded using plane waves with a cutoff energy for the plane wave basis set at 400 eV. 4 $\times$ 4 $\times$ 1 k-point sampling was adopted for the slabs. Geometric optimization was performed until the energy and forces were less than 10<sup>-4</sup> eV and 0.05 eV/Å, respectively. Vacuum layers of  $\sim$  12.5 Å were employed. All of the atoms were fully relaxed<sup>3</sup>.

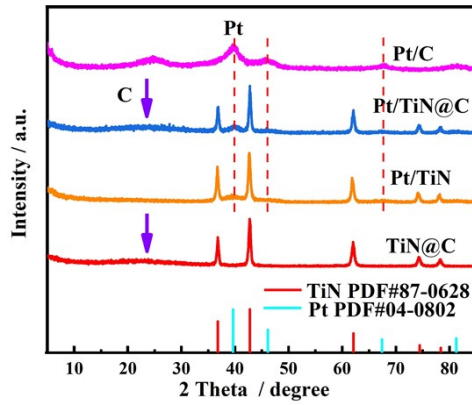

Figure S1. The XRD of Pt/C, Pt/TiN@C, Pt/TiN, and TiN@C.

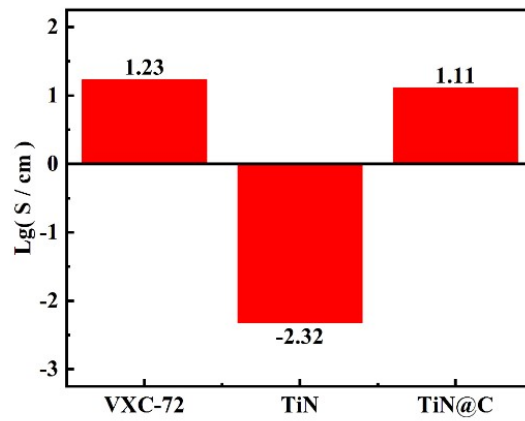

Figure S2. The conductivity of the VXC-72, TiN, and TiN@C, and the ordinate is the logarithm of the conductivity.

Table S1. The element tested by XPS

| element/atomic% | Pt   | Ti    | N     | C     | O     |
|-----------------|------|-------|-------|-------|-------|
| TiN             | -    | 31.12 | 24.17 | 11.86 | 32.74 |
| TiN@C           | -    | 34.86 | 31.21 | 9.13  | 24.81 |
| Pt/TiN@C        | 8.61 | 28.05 | 24.56 | 12.93 | 25.85 |

Table S2. The interaction of Pt and support in Pt/TiN and Pt/graphite

| Samples | $E_{Pt/support} / eV$ | $E_{support} / eV$ | $E_{detachment} / eV$ |
|---------|-----------------------|--------------------|-----------------------|
| Pt/TiN  | -620.63               | -616.25            | 4.38                  |
| Pt/C    | -666.67               | -664.54            | 2.13                  |

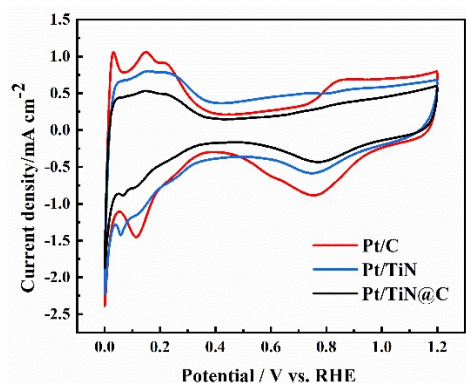

Figure S3. The CV curves in  $N_2$ -saturated  $HClO_4$  at the speed of  $50 \text{ mV s}^{-1}$  of Pt/C, Pt/TiN and Pt/TiN@C.

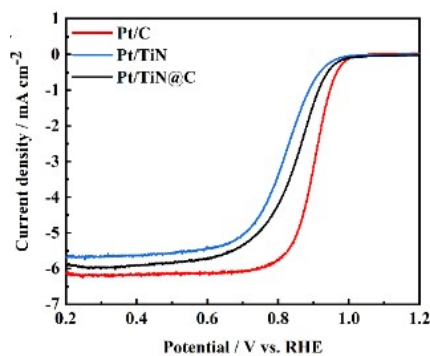

Figure S4. The LSV curves in  $O_2$ -saturated  $HClO_4$  at the speed of  $10 \text{ mV s}^{-1}$  of Pt/C, Pt/TiN and Pt/TiN@C at the speed of  $1600 \text{ r}\cdot\text{min}^{-1}$ .

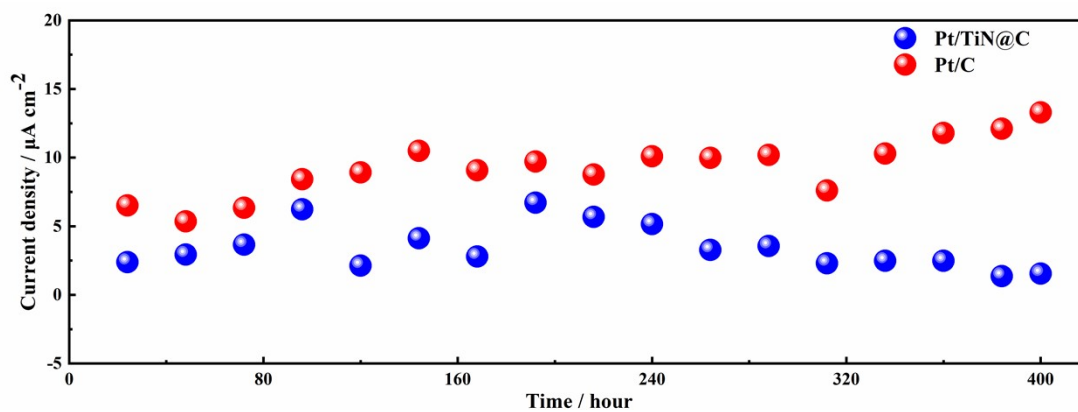

Figure S5. The corrosion current density of Pt/C and Pt/TiN@C in the current-time test

Table S3. The MA change of Pt/C and Pt/TiN@C ( $\text{mA mg}_{Pt}^{-1}$ )

| Time / h | Initial | 100    | 200    | 300    | 400   |
|----------|---------|--------|--------|--------|-------|
| Pt/C     | 176.62  | 133.41 | 127.15 | 120.23 | 85.82 |
| Pt/TiN@C | 154.28  | 149.35 | 104.16 | 89.30  | 82.98 |

Table S4. The ECSA change of Pt/C and Pt/TiN@C ( $\text{m}^2 \text{g}_{\text{Pt}}^{-1}$ )

| Time / h | Initial | 100   | 200   | 300   | 400   |
|----------|---------|-------|-------|-------|-------|
| Pt/C     | 71.42   | 54.76 | 36.31 | 23.06 | 21.42 |
| Pt/TiN@C | 69.18   | 59.21 | 42.37 | 39.88 | 35.30 |

**Reference**

1. Z. Lin, Y. Sheng, J. Li, Z. Rui, Y. Liu, J. Liu and Z. Zou, *Chem Commun (Camb)*, 2020, 56, 4276-4279.
2. J. Engel, S. Francis and A. Roldan, *Phys Chem Chem Phys*, 2019, 21, 19011-19025.
3. J. A. Kwon, M. S. Kim, D. Y. Shin, J. Y. Kim and D. H. Lim, *J. Ind. Eng. Chem.*, 2017, 49, 69-75.
